# Supplementary material for: Patient-Reported Quality of Life Outcomes after Moderately Hypofractionated and Normofractionated Proton Therapy for Localized Prostate Cancer
Source: MDPI journal article supplement (doi:10.3390/cancers14030517), 2022-01-20
Supplement: s1 [file s1]

Supplementary Materials

# Patient-Reported Quality of Life Outcomes after Moderately Hypofractionated and Normofractionated Proton Therapy for Localized Prostate Cancer

Koichiro Nakajima <sup>1,\*</sup>, Hiromitsu Iwata <sup>1</sup>, Yukiko Hattori <sup>1</sup>, Kento Nomura <sup>1</sup>, Kensuke Hayashi <sup>2</sup>, Toshiyuki Toshito <sup>3</sup>, Yukihiro Umemoto <sup>4</sup>, Shingo Hashimoto <sup>5</sup>, Hiroyuki Ogino <sup>1</sup> and Yuta Shibamoto <sup>5,6</sup>

<sup>1</sup> Department of Radiation Oncology, Nagoya Proton Therapy Center, Nagoya City University West Medical Center, Nagoya 462-8508, Japan; h-iwa-ncu@nifty.com (H.I.); hattoriy@med.nagoya-cu.ac.jp (Y.H.); knomura01i04m08t@gmail.com (K.N.); hogino2@med.nagoya-cu.ac.jp (H.O.)

<sup>2</sup> Department of Proton Therapy Technology, Nagoya Proton Therapy Center, Nagoya 462-8508, Japan; k.hayashi.12@west-med.jp

<sup>3</sup> Department of Proton Therapy Physics, Nagoya Proton Therapy Center, Nagoya 462-8508, Japan; t.toshitou.20@west-med.jp

<sup>4</sup> Department of Urology, Nagoya City University West Medical Center, Nagoya 462-8508, Japan; uro-ume@med.nagoya-cu.ac.jp

<sup>5</sup> Department of Radiology, Nagoya City University Graduate School of Medical Sciences, Nagoya 467-8601, Japan; hashimoto.ncu@gmail.com (S.H.); yshiba@med.nagoya-cu.ac.jp (Y.S.)

<sup>6</sup> Department of Radiation Oncology, Narita Memorial Proton Center, Toyohashi 441-8021, Japan

\* Correspondence: km\_rad@med.nagoya-cu.ac.jp; Tel.: +81-52-991-8577

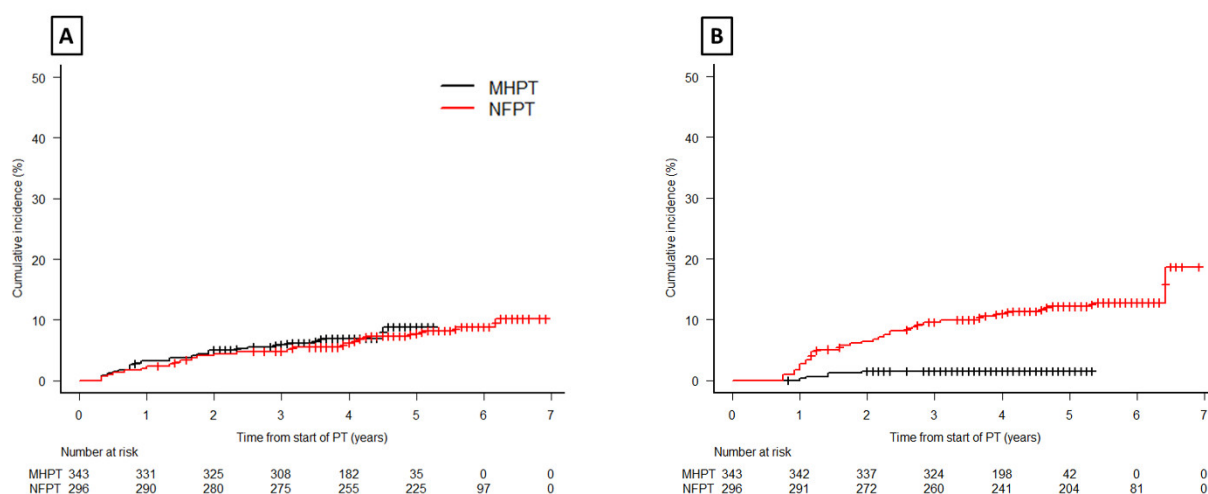

**Figure S1.** Cumulative incidence of (A) grade 2 or higher late genitourinary toxicity and; (B) grade 2 or higher late gastrointestinal toxicity. The estimated cumulative 3-year incidence of late grade 2 or higher genitourinary and gastrointestinal toxicity in the NFPT vs MHPT group was 4.8% (95% CI, 2.8% to 7.9%) vs. 5.9% (3.8% to 8.9%),  $p = 0.66$ , and 9.5% (6.7% to 14%) vs. 1.5% (0.6% to 3.5%),  $p < 0.001$ .

**Table S1.** Dose constraints for organs at risk.

| Total Dose (Gy (RBE)) | NFPT        |     | MHPT       |               |
|-----------------------|-------------|-----|------------|---------------|
|                       | 74          | 78  | 60         | 63            |
| Rectum Vx             |             |     | Rectum Vx  |               |
| 65                    |             | 15% | 53.5       | 15%           |
| 60                    |             | 18% | 50         | 18%           |
| 40                    |             | 30% | 34.5       | 30%           |
| Bladder Vx            |             |     | Bladder Vx |               |
| 65                    |             | 25% | 54.5       | 25%           |
| 40                    |             | 50% | 34.5       | 50%           |
| Small bowel Dmax      | 55 Gy (RBE) |     |            | 46 Gy (RBE)   |
| Large bowel Dmax      | 61 Gy (RBE) |     |            | 51 Gy (RBE)   |
| Hip joint Dmax        | 50 Gy (RBE) |     |            | 42.5 Gy (RBE) |

Abbreviations: NFPT, normofractionated proton therapy; MHPT, moderately hypofractionated proton therapy; Gy (RBE), gray relative biological effectiveness equivalents. Vx = percentage of the organ receiving at least X Gy (RBE).

**Table S2.** Response to specific questions in EPIC.

| Proportion of Patients Who Complained of a “Moderate” to “Big” Problem at Each Follow-up Point, among “No” to “Small” Problem at Baseline. |          |          |         |          |          |         |           |          |         |           |          |         |
|--------------------------------------------------------------------------------------------------------------------------------------------|----------|----------|---------|----------|----------|---------|-----------|----------|---------|-----------|----------|---------|
|                                                                                                                                            | 1 Month  |          |         | 6 Months |          |         | 12 Months |          |         | 36 Months |          |         |
|                                                                                                                                            | NFPT (%) | MHPT (%) | p value | NFPT (%) | MHPT (%) | p value | NFPT (%)  | MHPT (%) | p value | NFPT (%)  | MHPT (%) | p value |
| Urinary: How big a problem, if any, has each of the following been for you during the last 4 weeks?                                        |          |          |         |          |          |         |           |          |         |           |          |         |
| Dripping or leaking urine                                                                                                                  | 6 (2.1)  | 4 (1.2)  | 0.53    | 2 (0.7)  | 2 (0.7)  | 1       | 7 (2.5)   | 1 (0.3)  | 0.031   | 6 (2.3)   | 0 (0)    | 0.014   |
| Pain or burning on urination                                                                                                               | 10 (3.4) | 9 (2.8)  | 0.65    | 6 (2.1)  | 3 (1.0)  | 0.33    | 6 (2.1)   | 6 (1.9)  | 1       | 3 (1.2)   | 3 (1.1)  | 1       |
| Bleeding with urination                                                                                                                    | 1 (0.4)  | 1 (0.3)  | 1       | 0 (0)    | 1 (0.3)  | 1       | 3 (1.1)   | 2 (0.6)  | 0.67    | 1 (0.4)   | 1 (0.4)  | 1       |
| Weak urine stream or incomplete emptying                                                                                                   | 14 (5.0) | 24 (7.4) | 0.24    | 8 (2.9)  | 7 (2.3)  | 0.80    | 10 (3.6)  | 12 (3.9) | 1       | 8 (3.2)   | 6 (2.3)  | 0.60    |
| Waking up to urinate                                                                                                                       | 27 (10)  | 30 (10)  | 1       | 15 (5.7) | 9 (3.2)  | 0.21    | 16 (6.2)  | 12 (4.3) | 0.34    | 19 (8.2)  | 9 (3.8)  | 0.051   |
| Need to urinate frequently during the day                                                                                                  | 21 (7.6) | 40 (13)  | 0.04    | 13 (4.7) | 15 (5.2) | 0.85    | 12 (4.4)  | 16 (5.5) | 0.70    | 10 (4.1)  | 5 (2.0)  | 0.2     |
| Bowel: How big a problem, if any, has each of the following been for you?                                                                  |          |          |         |          |          |         |           |          |         |           |          |         |
| Urgency to have a bowel movement                                                                                                           | 3 (1.1)  | 4 (1.2)  | 1       | 4 (1.4)  | 4 (1.3)  | 1       | 4 (1.4)   | 4 (1.3)  | 1       | 6 (2.3)   | 3 (1.1)  | 0.33    |
| Increased frequency of bowel movements                                                                                                     | 4 (1.4)  | 5 (1.5)  | 1       | 7 (2.4)  | 4 (1.3)  | 0.37    | 6 (2.1)   | 3 (1.0)  | 0.32    | 3 (1.2)   | 2 (0.8)  | 0.68    |
| Watery bowel movements                                                                                                                     | 3 (1.1)  | 1 (0.3)  | 0.35    | 2 (0.7)  | 3 (1.0)  | 1       | 0 (0)     | 5 (1.6)  | 0.063   | 2 (0.8)   | 4 (1.5)  | 0.69    |
| Losing control of your stools                                                                                                              | 1 (0.4)  | 0 (0)    | 0.47    | 0 (0)    | 5 (1.6)  | 0.063   | 2 (0.7)   | 4 (1.3)  | 0.69    | 2 (0.8)   | 3 (1.1)  | 1       |
| Bloody stools                                                                                                                              | 0 (0)    | 1 (0.3)  | 1       | 4 (1.4)  | 6 (1.9)  | 0.75    | 15 (5.3)  | 10 (3.2) | 0.23    | 8 (3.2)   | 1 (0.4)  | 0.018   |
| Abdominal/Pelvic/Rectal pain                                                                                                               | 0 (0)    | 7 (2.1)  | 0.016   | 2 (0.7)  | 4 (1.3)  | 0.69    | 3 (1.1)   | 2 (0.7)  | 0.67    | 2 (0.8)   | 4 (1.5)  | 0.69    |

Abbreviations: EPIC, Expanded Prostate Cancer Index Composite; NFPT, normofractionated proton therapy; MHPT, moderately hypofractionated proton therapy.

**Table S3.** Acute and late toxicity.

|               | Genitourinary             |                           |                       | Gastrointestinal <sup>a</sup> |                           |                       |
|---------------|---------------------------|---------------------------|-----------------------|-------------------------------|---------------------------|-----------------------|
|               | NFPT<br>( <i>n</i> = 296) | MHPT<br>( <i>n</i> = 343) | <i>p</i> <sup>b</sup> | NFPT<br>( <i>n</i> = 296)     | MHPT<br>( <i>n</i> = 343) | <i>p</i> <sup>b</sup> |
| Acute Grade 2 | 47 (16%)                  | 26 (8%)                   | 0.001                 | 0                             | 1 (0.3%)                  | 1                     |
| Acute Grade 3 | 0                         | 0                         |                       | 0                             | 0                         |                       |
| Late Grade 2  | 21 (7%)                   | 24 (7%)                   | 0.66                  | 33 (11%)                      | 4 (1%)                    | <0.001                |
| Late Grade 3  | 4 (1%)                    | 1 (0.3%)                  |                       | 4 (1%)                        | 1 (0.3%)                  |                       |

Scored with the modified Common Terminology Criteria for Adverse Events, version 4.0, in which prescribing two and more types of drugs for dysuria was counted as a grade 2 genitourinary toxicity. Acute toxicities were defined as those occurring within 3 months of the start of proton therapy. <sup>a</sup> = All gastrointestinal toxicities were proctitis or rectal bleeding. <sup>b</sup> = Comparison of proportion of grade 2 or higher toxicities between NFPT and MHPT. These *p* values were calculated by the Fisher's exact test.
